# Supplementary material
Source: PubMed Central journal article supplement (PMC2650312)
Supplement: 0807774106_0807774106SI.pdf [file 0807774106_0807774106SI.pdf]

# Supporting Information

Tomita *et al.* 10.1073/pnas.0807774106

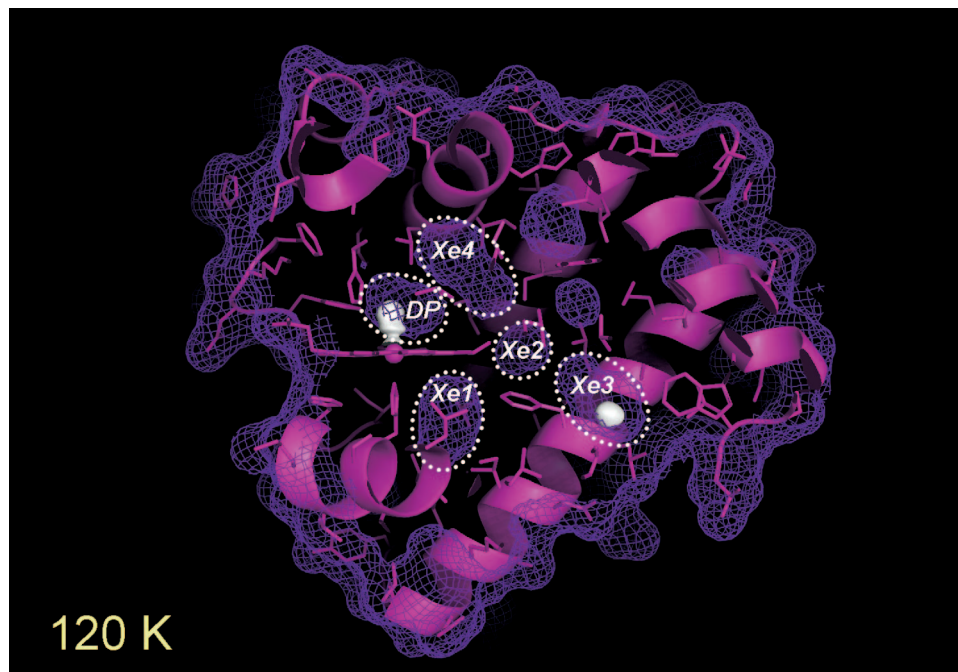

Movie S1. Ligand migration movie of MbCO at 120 K.

[Movie S1 \(AVI\)](#)

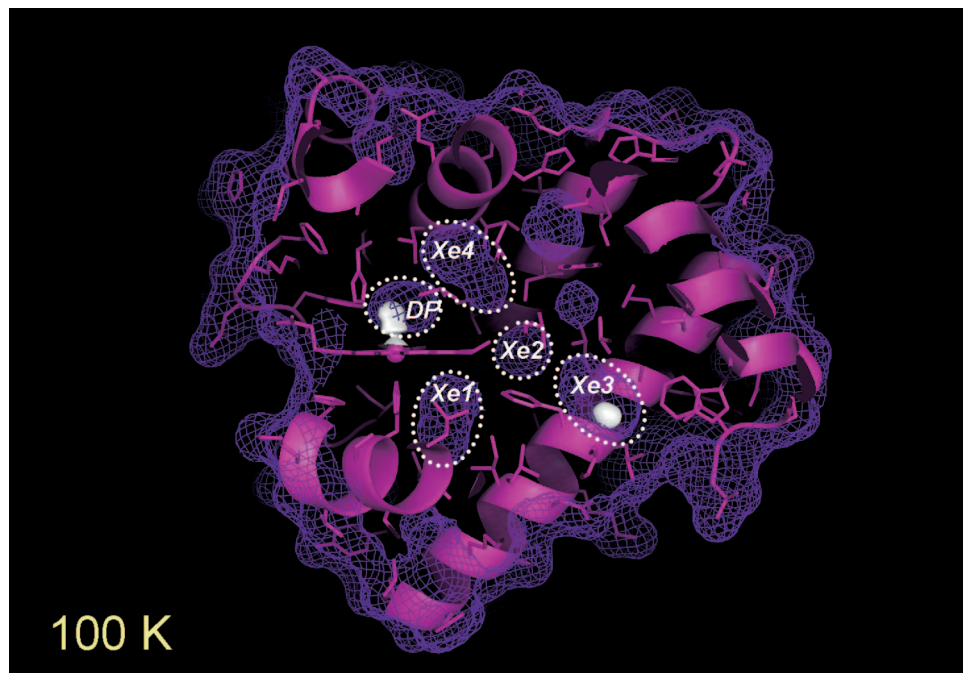

Movie S2. Ligand migration movie of MbCO at 100 K.

[Movie S2 \(AVI\)](#)

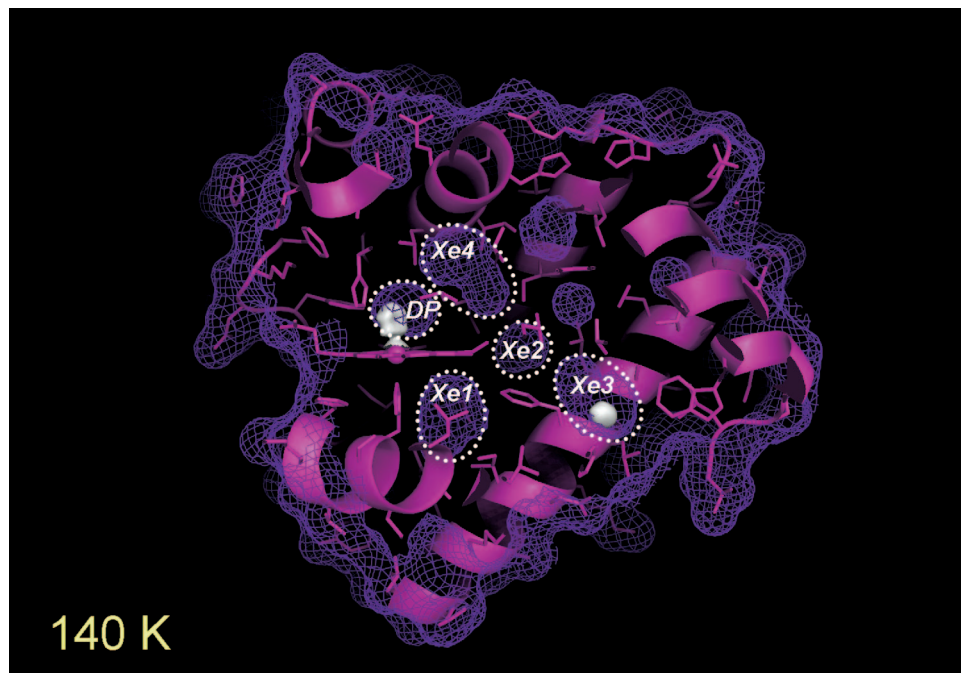

Movie S3. Ligand migration movie of MbCO at 140 K.

[Movie S3 \(AVI\)](#)

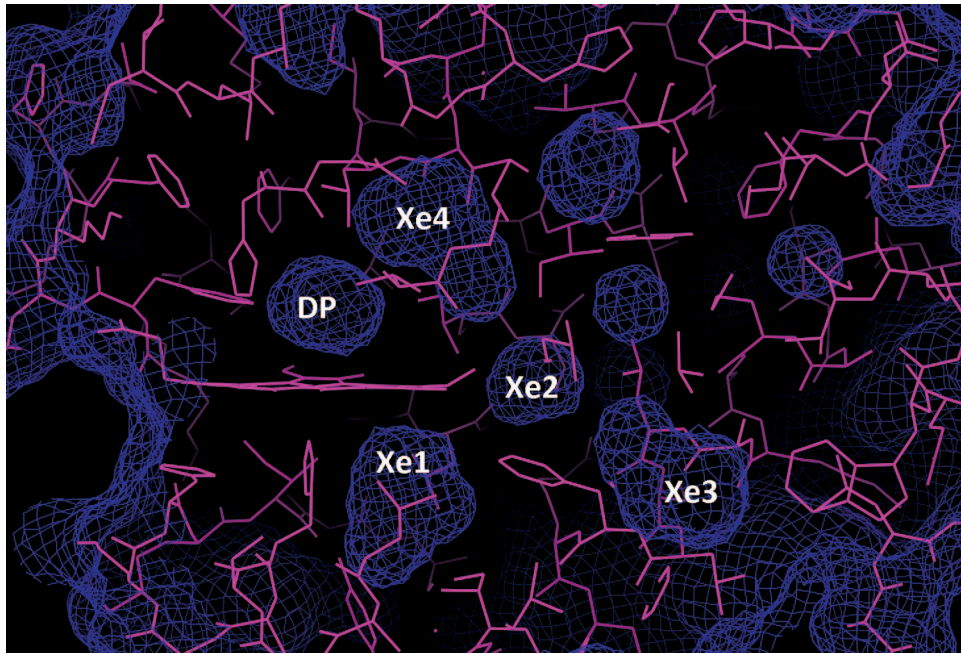

**Movie S4.** Movie of the tensor field of the structural changes represented by colored dots and 0.5-Å wires at 140 K.

[Movie S4 \(AVI\)](#)



**Table S2. The data collection and crystallographic analysis statistics at 120 K**

| Statistic            | Laser off            | 30 min               | 150 min              | 300 min              | 450 min              | 600 min              | 750 min              | 810 min              |
|----------------------|----------------------|----------------------|----------------------|----------------------|----------------------|----------------------|----------------------|----------------------|
| Space group          | P 1 2 <sub>1</sub> 1 |
| Cell dimensions a, Å | 34.536               | 34.425               | 34.431               | 34.439               | 34.446               | 34.453               | 34.460               | 34.462               |
| b, Å                 | 30.847               | 30.720               | 30.723               | 30.724               | 30.721               | 30.718               | 30.715               | 30.714               |
| c, Å                 | 63.897               | 63.843               | 63.861               | 63.876               | 63.891               | 63.907               | 63.923               | 63.932               |
| $\beta$ , °          | 105.647              | 105.541              | 105.542              | 105.553              | 105.570              | 105.588              | 105.607              | 105.617              |
| Wavelength, Å        | 0.827                | 0.827                | 0.827                | 0.827                | 0.827                | 0.827                | 0.827                | 0.827                |
| Resolution, Å        | 50.0–1.22            | 50.0–1.21            | 50.0–1.21            | 50.0–1.21            | 50.0–1.21            | 50.0–1.21            | 50.0–1.21            | 50.0–1.21            |
| $R_{\text{merge}}$   | 0.039(0.469)         | 0.052(0.253)         | 0.056(0.275)         | 0.051(0.310)         | 0.049(0.354)         | 0.053(0.380)         | 0.055(0.406)         | 0.054(0.421)         |
| $I/\sigma$           | 9.5(1.1)             | 13.2(2.4)            | 12.9(2.2)            | 12.4(1.9)            | 11.7(1.7)            | 11.1(1.5)            | 10.7(1.4)            | 10.6(1.3)            |
| Completeness         | 0.835(0.377)         | 0.981(0.874)         | 0.979(0.829)         | 0.979(0.803)         | 0.982(0.782)         | 0.972(0.706)         | 0.959(0.645)         | 0.952(0.586)         |
| Redundancy           | 3.2(2.0)             | 3.6(2.9)             | 3.6(2.9)             | 3.6(2.8)             | 3.6(2.6)             | 3.6(2.3)             | 3.5(2.1)             | 3.5(2.0)             |
| No. reflections      | 33,220               | 38,789               | 38,772               | 38,802               | 38,766               | 38,508               | 38,082               | 37,777               |
| $R$ factor           | 0.153                | 0.143                | 0.142                | 0.141                | 0.142                | 0.144                | 0.145                | 0.146                |
| $R_{\text{free}}$    | 0.207                | 0.182                | 0.182                | 0.179                | 0.183                | 0.186                | 0.188                | 0.191                |
| No. atoms            | 1,438                | 1,442                | 1,443                | 1,441                | 1,441                | 1,435                | 1,433                | 1,429                |
| Mean $B$ value       | 15.257               | 14.612               | 14.799               | 14.814               | 15.029               | 15.052               | 15.149               | 15.139               |
| rmsd bond length, Å  | 0.027                | 0.018                | 0.018                | 0.019                | 0.020                | 0.020                | 0.022                | 0.022                |
| rmsd angle, °        | 2.179                | 1.787                | 1.877                | 1.867                | 1.863                | 1.908                | 1.980                | 2.015                |

Values in parentheses are for the highest-resolution shell (1.25–1.21 Å).
